# Supplementary figures and images for: Intersection of two signalling pathways: extracellular nucleotides regulate pollen germination and pollen tube growth via nitric oxide
Source: PubMed Central journal article supplement — J Exp Bot. 2009 Apr 10;60(7):2129–38. doi: 10.1093/jxb/erp091 (PMC2682505; doi:10.1093/jxb/erp091), 2009-04-10

**A**

Percent Germination

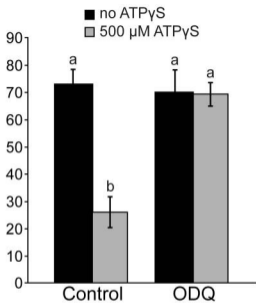**B**Pollen tube growth rate ( $\mu$ m/min)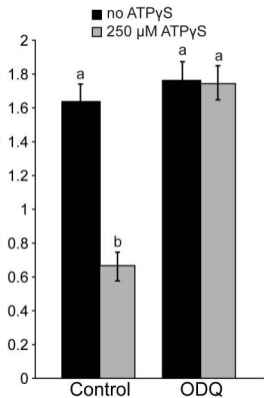

Supplement: erp091_1.pdf [file erp091_1.pdf]
